# Supplementary material
Source: Springer Nature journal article supplement (https://www.springermedizin.de/resource/supplementary/12939_2009_122_MOESM2_ESM.pdf/9551528)
Supplement: MOESM2 [file 9551528]

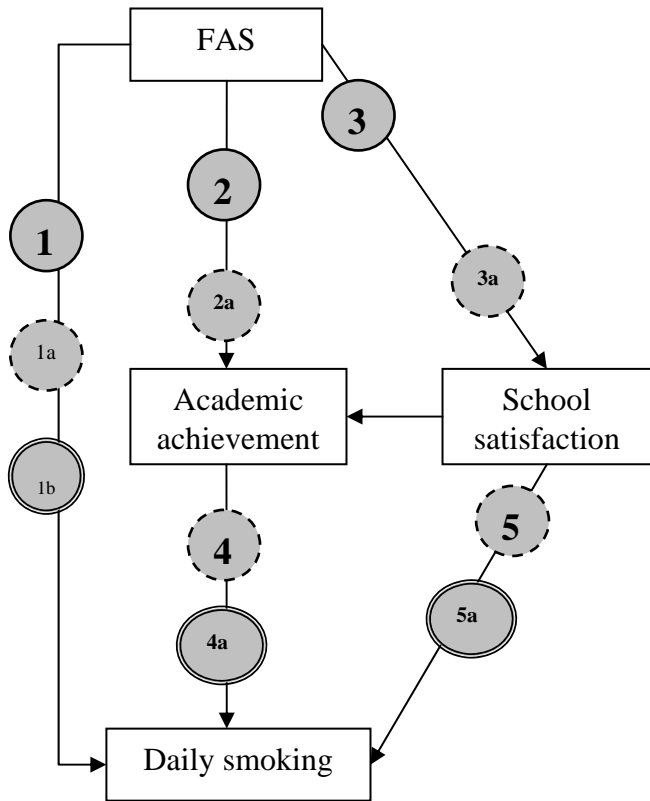

-  = crude estimates
-  = adjusted for one independent variable
-  = adjusted for two independent variables
